# Supplementary material for: A high-performance flexible humidity sensor based on a TiO2–MWCNT nanocomposite for human healthcare applications
Source: Royal Society of Chemistry journal article supplement (doi:10.1039/d4cp01148a), 2024-01-01
Supplement: d4cp01148a1.pdf [file d4cp01148a1.pdf]

## Supporting information

### A High-Performance Flexible Humidity Sensor based on TiO<sub>2</sub>-MWCNTs Nanocomposite for Human Healthcare

Ankit Kumar<sup>1,3</sup>, Parvesh Kumari<sup>1,3</sup>, M. Senthil Kumar<sup>2,3</sup>, Gaurav Gupta<sup>1</sup>, D.D.  
Shivagan<sup>1,3</sup>, Komal Bapna<sup>1,3\*</sup>

<sup>1</sup> Temperature and Humidity Metrology, CSIR- National Physical Laboratory, Dr. K. S.  
Krishnan Marg, New Delhi 110012

<sup>2</sup> Sensor Devices and Metrology, CSIR- National Physical Laboratory, Dr. K. S. Krishnan  
Marg, New Delhi 110012

<sup>3</sup> Academy of Scientific & Innovative Research (AcSIR), Ghaziabad-201002, India

\*E-mail: [komal.bapna@nplindia.org](mailto:komal.bapna@nplindia.org)

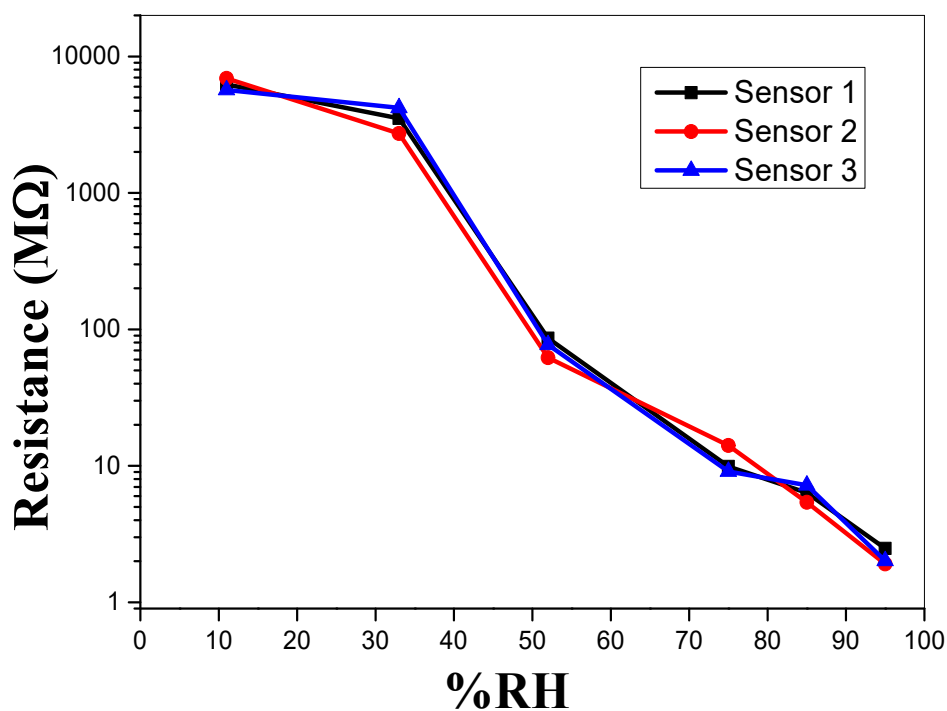

Fig. S1. The responses of the 3 composite sensors with respect to relative humidity.

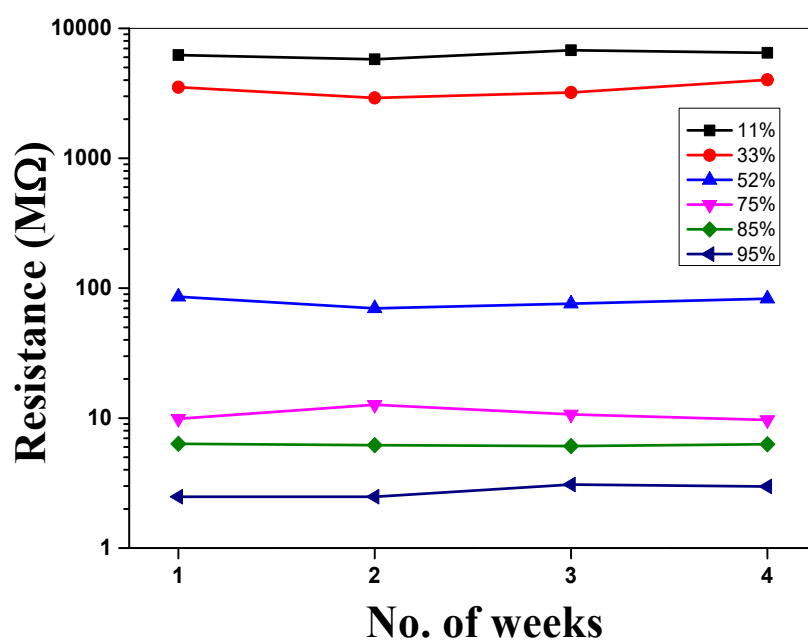

Fig. S2. Long term stability of the TiO<sub>2</sub>-MWCNTs composite based sensor.
